# Supplementary material for: Flow Manipulation and the Association with Myocardial Systolic Function During Extracorporeal Life Support
Source: Research Square preprint supplement (doi:10.21203/rs.3.rs-1187147/v1), 2021-12-29
Supplement: Supplementary file 1 [file 4e9b1c504cb722eea53fd52b.docx]

**Table S5. Comparison of Echo Findings at Different Levels of ECMO Target Blood Flow by Hospital Mortality**

|  | **Survivors (n=20)** | | |  | **Dead (n=25)** | | |  | **p-value of suvivors vs. dead** | | |
| --- | --- | --- | --- | --- | --- | --- | --- | --- | --- | --- | --- |
| **Variables** | **100% ECMO flow** | **120% ECMO flow** | **50% ECMO flow** |  | **100% ECMO flow** | **120% ECMO flow** | **50% ECMO flow** |  | **100%**  **ECMO Flow** | **120%**  **ECMO Flow** | **50%**  **ECMO Flow** |
| **Left ventricle size** | | | | | | | | | | | |
| **LVIDd, cm** | 4.7  (4.1-5.1) | 4.5  (3.3-5.1) | 4.3  (3.4-5.1) |  | 3.9  (3.4-4.7) | 4.0  (3.5-4.7) | 3.7  (3.3-4.4) |  | *0.011* | 0.39 | 0.10 |
| **LVIDs, cm** | 4.2  (3.5-4.9) | 4.1  (3.1-5.0) | 3.9  (3.0-4.8) |  | 3.5  (3.1-4.3) | 3.6  (3.1-4.3) | 3.4  (2.7-4.1) |  | 0.040 | 0.39 | 0.12 |
| **LVEDV, mL** | 73.0  (62.8-124.9) | 72.8  (44.9-130.6) | 78.1  (41.8-141.2) |  | 55.7  (33.8-98.9) | 57.4  (37.0-98.1) | 74.1  (38.0-96.8) |  | 0.16 | 0.22 | 0.37 |
| **LVESV, mL** | 59.3  (47.0-91.4) | 60.9  (32.3-109.8) | 47.9  (31.6-104.2) |  | 49.3  (27.2-83.9) | 54.9  (32.0-86.0) | 51.4  (22.3-71.8) |  | 0.16 | 0.51 | 0.31 |
|  |  |  |  |  |  |  |  |  |  |  |  |
| **Left ventricular systolic function** | | | | | | | | | | | |
| **LVEF, %** | | | | | | | | | | | |
| **-   Linear method** | 13.2  (7.1-25.5) | 12.3  (4.4-22.0) | 22.8  (14.3-35.0) |  | 15.8  (9.4-24.5) | 10.9  (6.2-20.9) | 24.3  (15.0-31.9) |  | 0.49 | 0.70 | 0.78 |
| **-   Biplane** | 17.6  (10.1-28.9) | 12.2  (8.9-26.0) | 29.7  (17.8-34.3) |  | 16.8  (9.5-28.5) | 13.7 (  8.0-26.3) | 27.5  (18.0-35.8) |  | 0.87 | 0.93 | 0.84 |
| **FS, %** | 5.8  (3.1-11.7) | 5.2  (2.1-9.6) | 10.7  (6.2-16.5) |  | 6.3  (3.9-9.9) | 4.7  (2.7-9.3) | 10.9  (6.8-14.8) |  | 0.78 | 0.75 | 0.78 |
| **LIMP** | 1.6  (1.1-2.0) | 1.8  (1.3-2.4) | 1.0  (0.8-1.4) |  | 1.6  (1.1-2.5) | 1.7  (1.1-2.2) | 1.1  (0.9-1.6) |  | 0.35 | 0.56 | 0.27 |
| **LVOT VTI, cm** | 5.2  (2.9-9.2) | 4.1  (1.8-8.5) | 8.4  (5.5-11.0) |  | 4.6  (2.4-6.8) | 3.5  (2.0-6.3) | 6.1  (3.8-11.7) |  | 0.24 | 0.65 | 0.42 |
| **s’ – medial mitral annulus, m/s** | 0.04  (0.03-0.04) | 0.04  (0.03-0.04) | 0.04  (0.04-0.05) |  | 0.03  (0.03-0.06) | 0.03  (0.03-0.04) | 0.04  (0.03-0.06) |  | 0.96 | 0.68 | 0.96 |
| **s’ – lateral mitral annulus, m/s** | 0.04  (0.03-0.06) | 0.04  (0.03-0.05) | 0.06  (0.04-0.06) |  | 0.04  (0.03-0.06) | 0.04  (0.03-0.06) | 0.04  (0.03-0.06) |  | 0.96 | 0.39 | 0.57 |
|  |  |  |  |  |  |  |  |  |  |  |  |
| **Left ventricular diastolic function** | | | | | | | | | | | |
| **E/A (if patient is in SR)** | 0.8  (0.7-1.1) | 0.8  (0.6-1.1) | 0.9  (0.6-1.2) |  | 0.8  (0.5-1.0) | 0.8  (0.6-1.1) | 0.8  (0.7-0.9) |  | 0.89 | 0.98 | 0.52 |
| **e’ – medial, m/s** | 0.02  (0.02-0.04) | 0.03  (0.02-0.04) | 0.03  (0.02-0.05) |  | 0.03  (0.02-0.04) | 0.03  (0.02-0.04) | 0.03  (0.02-0.05) |  | 0.39 | 0.69 | 0.89 |
| **e’ –lateral, m/s** | 0.04  (0.03-0.05) | 0.03  (0.02-0.05) | 0.04  (0.03-0.05) |  | 0.03  (0.03-0.05) | 0.03  (0.02-0.03) | 0.03  (0.03-0.05) |  | 0.14 | 0.44 | 0.56 |
| **E/e’- mean** | 12.2  (8.2-16.3) | 13.2  (8.7-16.6) | 12.3  (10.2-20.4) |  | 11.9  (9.2-19.7) | 8.5  (7.3-20.0) | 8.4  (7.1-13.9) |  | 0.65 | 0.53 | 0.044 |
|  |  |  |  |  |  |  |  |  |  |  |  |
| **Hemodynamic parameters** | | | | | | | | | | | |
| **SBP, mmHg** | 96  (77-107) | 98  (80-107) | 86  (75-98) |  | 90 (  76-101) | 102  (84-116) | 84  (65-107) |  | 0.47 | 0.41 | 0.71 |
| **DBP, mmHg** | 76±18 | 70±14 | 61±13 |  | 72±16 | 73±19 | 60±18 |  | 0.45 | 0.62 | 0.89 |
| **MAP, mmHg** | 78±15 | 78±14 | 70±15 |  | 73±20 | 78±20 | 65±23 |  | 0.37 | 0.88 | 0.44 |
| **HR, bpm** | 87±19 | 83±20 | 91±21 |  | 98±18 | 97±17 | 96±17 |  | 0.046 | *0.018* | 0.34 |
| **Stroke volume, mL** | 17  (9-27) | 13  (7-25) | 27  (17-32) |  | 13  (6-23) | 10  (6-21) | 18  (11-42) |  | 0.21 | 0.42 | 0.28 |
| **Cardiac output, L/min** | 1.4  (0.9-2.2) | 0.9  (0.6-2.5) | 2.2  (1.3-3.1) |  | 1.3  (0.7-2.3) | 1.1  (0.5-2.2) | 1.8  (1.1-3.1) |  | 0.57 | 0.98 | 0.57 |
| **Cardiac index, L/min/m2** | 0.7  (0.5-1.2) | 0.5  (0.3-1.4) | 1.2  (0.7-1.7) |  | 0.8  (0.4-1.3) | 0.6  (0.3-1.3) | 1.0  (0.7-1.8) |  | 0.57 | 1.00 | 0.62 |
| **CPO, Watts** | 0.2  (0.1-0.4) | 0.2  (0.1-0.4) | 0.4  (0.2-0.5) |  | 0.2  (0.1-0.4) | 0.2  (0.1-0.4) | 0.3  (0.1-0.5) |  | 0.37 | 0.98 | 0.28 |
| **CPI, Watts/m2** | 0.1  (0.1-0.2) | 0.1  (0.0-0.2) | 0.2  (0.1-0.3) |  | 0.1  (0-0.2) | 0.1  (0-0.2) | 0.2  (0.1-0.3) |  | 0.51 | 0.94 | 0.41 |
|  |  |  |  |  |  |  |  |  |  |  |  |
| **Strain values, %** | | | | | | | | | | | |
| **Global longitudinal strain** | -2.7  (-5.6-0) | -0.7  (-4.5-0) | -4.8  (-8.3--1.1) |  | -2.8  (-5.3-0) | 0  (-5.2-0) | -4.5  (-7.6--1.2) |  | 0.81 | 0.78 | 0.98 |
| **Longitudinal 3-chamber strain** | -4.2  (-6.2-0) | 0  (-5.2-0) | -5.0  (-9.4-0) |  | -3.4  (-8.2-0) | 0  (-6.0-0) | -4.7  (-7.8-0) |  | 0.64 | 0.96 | 0.72 |
| **Longitudinal 2-chamber strain** | -3.9  (-6.0-0) | 0  (-4.9.0) | -5.1  (-9.1--1.5) |  | -3.1  (-4.3-0) | 0  (-3.8-0) | -3.8  (-8.5-0) |  | 0.74 | 0.72 | 0.79 |
| **Longitudinal 4-chamber strain** | -1.6  (-5.0-0) | 0  (-5.7-0) | -3.8  (-6.7-0) |  | 0  (-5.5-0) | 0  (-4.8-0) | -3.5  (-8.2-0) |  | 0.97 | 0.66 | 0.57 |

**Abbreviations:** CPI: cardiac power index; CPO: cardiac power output; DBP: diastolic blood pressure; e’: early diastolic tissue velocity at mitral annulus; E/A: early to late diastolic transmitral flow velocity; E/e’: early diastolic transmitral flow velocity to e’; ECMO: extracorporeal membrane oxygenation; FS: fractional shortening; HR: heart rate; LIMP: left ventricular index of myocardial performance; LVEDV: left ventricular end-diastolic volume; LVEF: left ventricular ejection fraction; LVESV: left ventricular end-systolic volume; LVIDd: left ventricular internal diameter in diastole; LVIDs: left ventricular internal diameter in systole; LVOT: left ventricular outflow trace; MAP: mean arterial pressure; s’: peak systolic tissue velocity at mitral annulus; SBP: systolic blood pressure; VTI: velocity time integral.
