# Supplementary material for: Flow Manipulation and the Association with Myocardial Systolic Function During Extracorporeal Life Support
Source: Research Square preprint supplement (doi:10.21203/rs.3.rs-1187147/v1), 2021-12-29
Supplement: Supplementary file 2 [file 5520f259937178b7a09230fd.docx]

| **Table S2. Clinical data of patients with ECPR** | |
| --- | --- |
| **ECPR** | **N=32** |
| Out-of-hospital cardiac arrest | 15 (46.9%) |
| Witnessed arrest | 30 (93.8% |
| Presence of bystander CPR | 28 (87.5%) |
| First detected rhythm |  |
| -       VT/VF | 17 (53.1%) |
| - PEA | 12 (37.5%) |
| -       Asystole | 2 (6.3%) |
| Defibrillation during CPR | 21 (65.6%) |
| ROSC before ECMO established | 6 (18.8%) |
| No flow time a | 0 (0-0) |
| Low flow time b | 49 (37-59) |
| Myocarditis treatment | 1 (3.1%) |
| PCI after ECMO established | 17 (53.1%) |

All data are presented as frequency with percentages or mean ± standard deviation, or median with interquartile range (IQR) unless specified.

a No flow time: time from arrest to CPR in minutes

b Low flow time: time from onset of CPR to ECMO in minutes

**Abbreviations:** CPR: cardiopulmonary resuscitation; ECMO: extracorporeal membrane oxygenation; ECPR: extra-corporeal cardiopulmonary resuscitation; PCI: percutaneous coronary intervention; PEA: pulseless electrical activity; ROSC: return of spontaneous circulation; VT/VF: pulseless ventricular tachycardia or ventricular fibrillation.
