# Supplementary material for: Flow Manipulation and the Association with Myocardial Systolic Function During Extracorporeal Life Support
Source: Research Square preprint supplement (doi:10.21203/rs.3.rs-1187147/v1), 2021-12-29
Supplement: Supplementary file 3 [file 707b0e4e466fffe4560e0543.docx]

**Table S1. Two-dimensional echocardiographic measurements and normal values**

| **Measurement** | **Calculations** | **Normal value** |
| --- | --- | --- |
| **Left heart volume** | | |
| LVEDV, mL | Biplane method of disks summation | 76±15 in female  106±22 in male |
|  |  |  |
| LVESV, mL | Biplane method of disks summation | 28±7 in female  41±10 in male |
|  | | |
| **Left ventricular function** | | |
| LVEF, % | Linear method  Biplane method | 64±5 in female  62±5 in male |
|  |  |  |
| FS, % | 2D linear measurement | 27-45 in female  25-43 in male |
| LIMP | Global estimate of both systolic and diastolic function | <0.40 |
| S’, cm/s | Peak systolic tissue velocity at the mitral annulus | >10 |
|  | | |
| **Hemodynamic data** | | |
| SV, mL | LVOT CSA x LVOT VTI | 60-100 |
| CI, L/min/m2 |  | 2.4-4.0 |
| CPI, Watts/ m2 |  | >0.6 |
|  | | |
| **Strain** | | |
| GLS, % | Average of longitudinal strain in 3-,4- and 2- chamber views | 17.3-21.5 |

**Abbreviations:** CI: cardiac index; CPI: cardiac power index; CSA: cross sectional area; FS: fractional shortening; GLS: global longitudinal strain; LIMP: left index of myocardial performance; LVEDV: left ventricular end diastolic volume; LVEF: left ventricular ejection fraction; LVESV: left ventricular end systolic volume; LVOT: left ventricular outflow tract; S’: peak systolic annulus velocity; SV: stroke volume; VTI: velocity time integral.
