# Supplementary material for: Flow Manipulation and the Association with Myocardial Systolic Function During Extracorporeal Life Support
Source: Research Square preprint supplement (doi:10.21203/rs.3.rs-1187147/v1), 2021-12-29
Supplement: Supplementary file 4 [file 733e06e67508c6fc4bde756c.docx]

| **Table S3. Clinical Parameters of the study population** | |
| --- | --- |
| **Hemodynamic parameters**  **(worst values on day 1 of ECMO)** | **N=45** | |
| Mean arterial pressure, mmHg | 61 (47-82) | |
| Heart rate, bpm | 114 (95-127) | |
|  |  | |
| **Vasopressor/ inotrope use**  **(maximum dose on day 1 of ECMO)** |  | |
| -         Noradrenaline, mcg/min/kg | 0.3 (0.1-0.4) | |
| -         Adrenaline, mcg/min/kg | 0.2 (0.1-0.3) | |
| -         Dobutamine, mcg/min/kg | 4.1 (2.6-6.3) | |
| -         Dopamine, mcg/min/kg | 15.4 (11.0-21.0) | |
|  |  | |
| **Biochemistry (worst values on day 1 of ECMO)** |  | |
| **Renal** |  | |
| -         Creatinine, umol/L | 195.0 (133.0-294.0) | |
| -         Arterial blood pH | 7.0 ± 0.2 | |
| -         Bicarbonate, mmol/L | 13.6 ± 5.7 | |
| -         Base excess, mmol/L | -16.0 ± 7.7 | |
| **Liver** |  | |
| -         Bilirubin, umol/L | 17.5 (10.4-29.0) | |
| -         Alanine transaminase U/L | 198.0 (90.5-519.0) | |
| -         International normalized ratio | 1.6 (1.3-2.5) | |
| **Hematological** |  | |
| -         Hemoglobin, g/dL | 10.5 ± 2.1 | |
| -         White cell count, x109/L | 18.1 (15.8-21.6) | |
| -         Platelet, x109/L | 128.1 ± 71.8 | |
| **Respiratory** |  | |
| -         PaO2, kPa | 10.0 (7.9-14.2) | |
| -         PaCO2, kPa | 7.6 (6.4-10.3) | |
| **Cardiovascular** |  | |
| -         Creatine Kinase, U/L | 477.5 (182.5-969.5) | |
| -         Troponin T, ng/L | 8,380 (1,523-21,114) | |
| -         Lactate, mmol/L | 11.7 ± 6.0 | |
|  |  | |

All data are presented as frequency with percentages or mean ± standard deviation, or median with interquartile range (IQR) unless specified.

**Abbreviations:** ECMO: extracorporeal membrane oxygenation; PaO2: partial pressure of oxygen; PaCO2: partial pressure of carbon dioxide.
