# Supplementary material for: Flow Manipulation and the Association with Myocardial Systolic Function During Extracorporeal Life Support
Source: Research Square preprint supplement (doi:10.21203/rs.3.rs-1187147/v1), 2021-12-29
Supplement: Supplementary file 5 [file c6ffcef4051798b1ba94d751.docx]

| **Table S4. Clinical outcomes of the study population** | |
| --- | --- |
| **Patient outcomes** | **N=45** |
| ECMO duration, hours | 134.3 (76.6-189.6) |
| ICU length of stay, days | 7.3 (5.1-13.0) |
| Able to wean off ECMO | 23 (51.1%) |
| Survival to discharge from ICU | 21 (46.7%) |
| Survival to discharge from hospital | 20 (44.4%) |
| 30-day mortality | 25 (55.6%) |
|  |  |
| **Other modality of mechanical support** |  |
| -         IABP | 6 (13.3%) |
| -         Renal replacement therapy | 19 (42.2%) |
| -         Mechanical ventilator | 42 (93.3%) |
| - LVAD implant or heart transplant | 2 (4.4%) |
| - Myocarditis treatment | 4 (8.9%) |
| - PCI after ECMO established | 18 (40.0%) |
|  |  |
| **Major complications during ECMO** |  |
| Ischemic limb a | 2 (4.4%) |
| Ischemic stroke | 3 (6.7%) |
| **Major bleeding** b **:** |  |
| - Gastrointestinal bleeding | 6 (13.3%) |
| - Intracerebral hemorrhage | 2 (4.4%) |
| - Other severe bleeding require surgery for  hemostasis | 2 (4.4%) |

All data were presented as median with interquartile range or frequency with percentage unless specified.

a Ischemic limb was defined as sudden decrease in distal limb perfusion at the limbs with ECMO cannulas placed proximally, resulting in potential threat to limb viability requiring intervention.

b Major bleeding was defined according to ELSO definitions [1]. Clinically overt bleeding associated with hemoglobin drop of at least 2g/dL over 24 hours or a transfusion requirement of 1 or more unit of 10ml/kg packed cells; retroperitoneal, pulmonary, central nervous system bleeding, or bleeding that requires surgical intervention were also considered as major bleeding

**Abbreviations:** ECMO: extracorporeal membrane oxygenation;IABP: intra-aortic balloon pump; ICU: intensive care unit; LVAD: left ventricular assist device; PCI: percutaneous coronary intervention.

**References:**

1. Lequier L, Annich G, Al-Ibrahim O. ELSO anticoagulation guideline. 2014. https://www.elso.org/portals/0/files/elsoanticoagulationguideline8-2014-table-contents.pdf. Accessed July 18 2021.
